# Supplementary material for: Low frequency noise and photo-enhanced field emission from ultrathin PbBi2Se4 nanosheets
Source: Royal Society of Chemistry journal article supplement (doi:10.1039/c5tc02993g), 2015-12-30
Supplement: c5tc02993g1.pdf [file c5tc02993g1.pdf]

## Supporting Information

### **Low Frequency Noise and Photosensitive Field Emission from Ultrathin PbBi<sub>2</sub>Se<sub>4</sub> Nanosheets**

*Sachin R. Suryawanshi, Satya N. Guin, Arindom Chatterjee, Vikas kashid, Mahendra A. More,\*  
Dattatray J. Late, \*Kanishka Biswas\**

Sachin R. Suryawanshi, Vikas Kashid and Dr. Mahendra A. More  
Centre for Advanced Studies in Materials Science and Condensed Matter Physics, Department of  
Physics, University of Pune, Pune 411007, India

Satya N. Guin, Arindom Chatterjee and Dr. Kanishka Biswas  
New Chemistry Unit, Jawaharlal Nehru Centre for Advanced Scientific Research, Jakkur PO,  
Bangalore 560064, India

Dr. Dattatray J. Late  
Physical and Materials Chemistry Division, CSIR-National Chemical Laboratory, Dr. Homi  
Bhabha Road, Pashan, Pune- 411008, India

\*E-mail: [datta099@gmail.com](mailto:datta099@gmail.com), [mam@physics.unipune.ac.in](mailto:mam@physics.unipune.ac.in), [kanishka@jncasr.ac.in](mailto:kanishka@jncasr.ac.in)

**Figure S1**

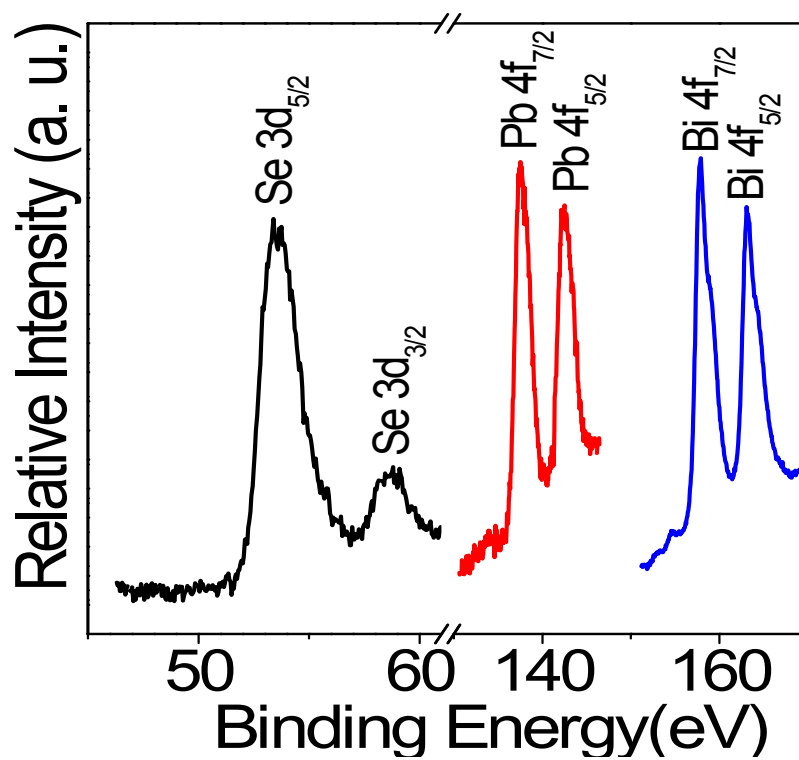

**Figure S1:** XPS spectra of the PbBi<sub>2</sub>Se<sub>4</sub> nanosheets showing Se3d<sub>5/2</sub>, Se3d<sub>3/2</sub>, Pb4f<sub>7/2</sub>, Pb4f<sub>5/2</sub>, Bi4f<sub>7/2</sub> and Bi4f<sub>5/2</sub> states.<sup>25</sup>

**Figure S2**

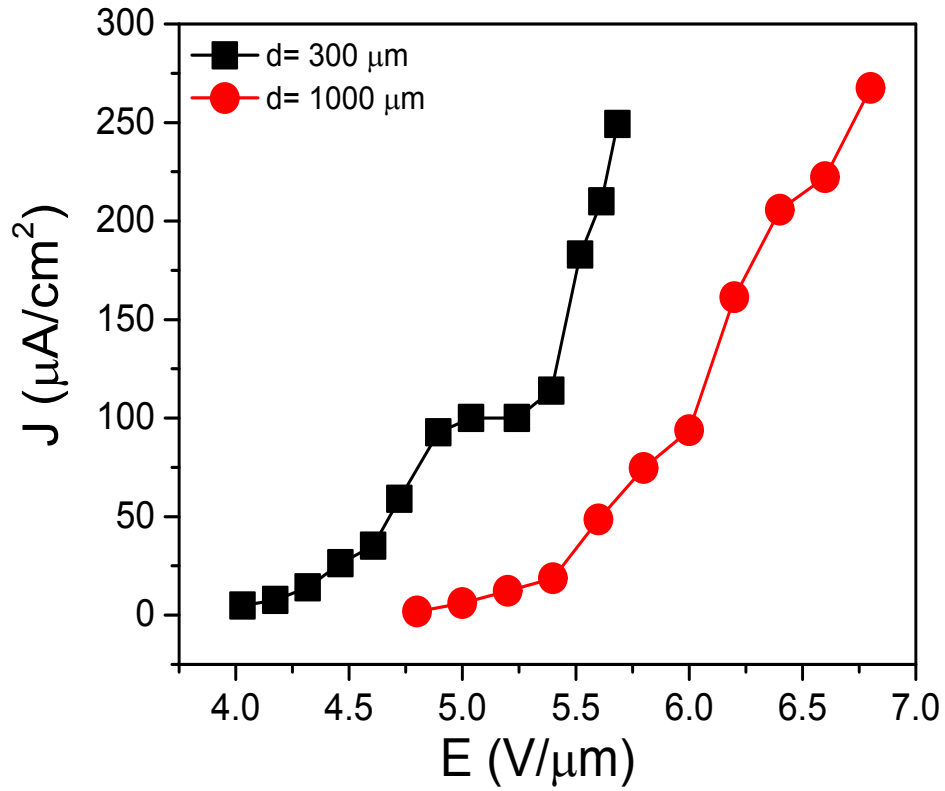

**Figure S2:** Observed J-E characteristic of PbBi<sub>2</sub>Se<sub>4</sub> nanosheets at d= 300 and d= 1000 μm distances.

**Table S1:** Comparison table of turn on value and threshold value for d= 300 and d= 1000 μm distances.

| PbBi <sub>2</sub> Se <sub>4</sub> nanosheets | Turn-on field (for 1 μA/cm <sup>2</sup> ) | Threshold field (for 10 μA/cm <sup>2</sup> ) | Max current density of μA/cm <sup>2</sup> |
|----------------------------------------------|-------------------------------------------|----------------------------------------------|-------------------------------------------|
| d= 300 μm                                    | ~ 4.00 V/μm                               | ~4.30V/μm                                    | ~249 μA/cm <sup>2</sup>                   |
| d= 1000 μm                                   | ~ 4.80 V/μm                               | ~5.00V/μm                                    | ~267 μA/cm <sup>2</sup>                   |

**Figure S3**

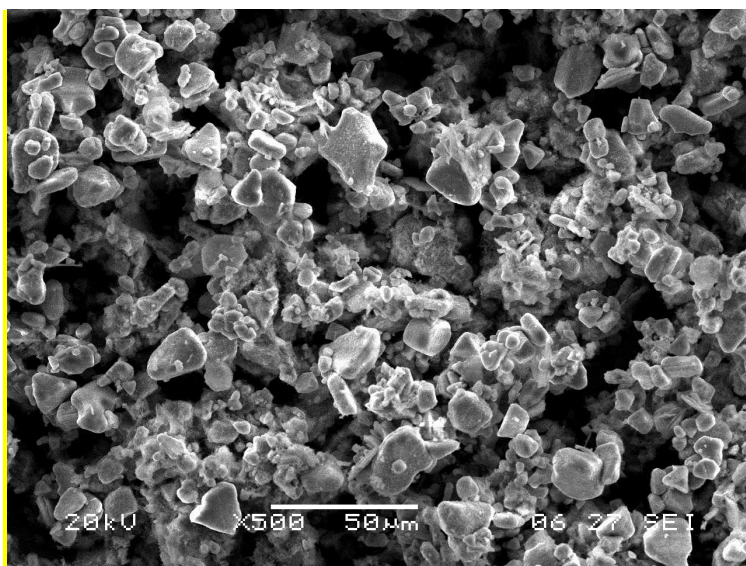

**Figure S3** SEM image of the extracting anode (semitransparent cathodoluminescent Phosphor screen).
